CORRECTION

# Correction: Penetration of the Stigma and Style Elicits a Novel Transcriptome in Pollen Tubes, Pointing to Genes Critical for Growth in a Pistil

Yuan Qin, Alexander R. Leydon, Ann Manziello, Ritu Pandey, David Mount, Stojan Denic, Bane Vasic, Mark A. Johnson, Ravishankar Palanivelu

Concerns were raised regarding errors in panel B of [S2 Fig](#). Specifically, the RT-PCR gel electrophoresis results were duplicated for At3g06830 and At1g73630, and for At3g01820 and At2g28080. The authors determined the source of the errors that were made in the preparation of [S2 Fig](#) and have provided a corrected figure here.

## Supporting Information

**S2 Fig. RT-PCR analysis of gene expression.** Total RNA from indicated tissues—dry pollen, 0.5 h PT, 4 h PT, 8- and 21-day-old seedlings (DS)—was used as templates to perform oligo-dT primed reverse transcription reactions followed by cDNA synthesis. RT-PCR was performed with cDNAs from indicated tissues and gel images of PCR products amplified are shown. (A) RT-PCR analysis of pollen-enriched and pollen-expressed genes. (B) RT-PCR analysis of genes that are significantly altered in SIV PT compared to 4 h PT. (C) RT-PCR analysis of pistil-dependent gene expression changes in vivo. Samples analyzed were dry pollen, unpollinated ms1 pistils (virgin pistil), ms1 pistils pollinated for one minute (1 m pollinated pistil) and ms1 pistils pollinated for two hours (2 h pollinated pistil). (TIF)

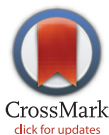

CrossMark  
click for updates

## Reference

1. Qin Y, Leydon AR, Manziello A, Pandey R, Mount D, Denic S, et al. (2009) Penetration of the Stigma and Style Elicits a Novel Transcriptome in Pollen Tubes, Pointing to Genes Critical for Growth in a Pistil. *PLoS Genet* 5(8): e1000621. doi: [10.1371/journal.pgen.1000621](https://doi.org/10.1371/journal.pgen.1000621) PMID: [19714218](https://pubmed.ncbi.nlm.nih.gov/19714218/)

## OPEN ACCESS

**Citation:** Qin Y, Leydon AR, Manziello A, Pandey R, Mount D, Denic S, et al. (2016) Correction: Penetration of the Stigma and Style Elicits a Novel Transcriptome in Pollen Tubes, Pointing to Genes Critical for Growth in a Pistil. *PLoS Genet* 12(7): e1000621. doi:[10.1371/journal.pgen.1000621](https://doi.org/10.1371/journal.pgen.1000621)

**Published:** July 19, 2016

**Copyright:** © 2016 Qin et al. This is an open access article distributed under the terms of the [Creative Commons Attribution License](https://creativecommons.org/licenses/by/4.0/), which permits unrestricted use, distribution, and reproduction in any medium, provided the original author and source are credited.
